# Supplementary material for: Contribution of modifiable risk factors for hypertension and type-2 diabetes in Peruvian resource-limited settings
Source: PubMed Central journal article supplement (PMC4717378; doi:10.1136/jech-2015-205988), 2015-08-06

## ONLINE SUPPLEMENT

**E-Table 1:** Population attributable risks of the main modifiable risk factors

|                                  | Total |             |        | Lima  |             |        | Urban Puno |             |        | Rural Puno |             |       | Tumbes |             |        |
|----------------------------------|-------|-------------|--------|-------|-------------|--------|------------|-------------|--------|------------|-------------|-------|--------|-------------|--------|
|                                  | P     | PR          | PAR    | P     | PR          | PAR    | P          | PR          | PAR    | P          | PR          | PAR   | P      | PR          | PAR    |
| <b>Hypertension</b>              |       |             |        |       |             |        |            |             |        |            |             |       |        |             |        |
| Daily smoking                    | 3.2%  | <b>1.76</b> | 3.0%   | 3.2%  | <b>2.61</b> | 6.0%   | 2.1%       | --          | --     | 0.2%       | --          | --    | 5.4%   | 1.39        | 3.1%   |
| Heavy alcohol drinking           | 5.3%  | <b>1.61</b> | 2.7%   | 5.5%  | 1.36        | 1.5%   | 6.5%       | 1.03        | 0.1%   | 2.9%       | 1.82        | 2.3%  | 5.8%   | 1.72        | 4.6%   |
| Low physical activity            | 31.9% | 0.94        | -2.3%  | 19.1% | 1.20        | 3.7%   | 21.3%      | 0.53        | -10.6% | 25.6%      | 0.99        | -2.7% | 54.2%  | 0.86        | -8.0%  |
| 2+ hours watching TV             | 42.7% | 1.03        | 1.1%   | 48.4% | 1.07        | 3.3%   | 46.2%      | 1.13        | 4.7%   | 14.3%      | 0.86        | -1.4% | 50.9%  | 1.02        | 1.1%   |
| Low fruits and vegetables intake | 95.9% | 2.42        | 57.9%  | 93.3% | 1.05        | 4.2%   | 93.4%      | --          | --     | 98.1%      | --          | --    | 98.7%  | --          | --     |
| Obesity                          | 26.9% | <b>2.06</b> | 15.7%  | 31.7% | <b>2.22</b> | 22.1%  | 26.6%      | <b>2.52</b> | 24.1%  | 10.1%      | <b>2.74</b> | 9.5%  | 31.6%  | <b>1.68</b> | 12.5%  |
| <b>Diabetes</b>                  |       |             |        |       |             |        |            |             |        |            |             |       |        |             |        |
| Daily smoking                    | 3.2%  | 1.19        | 0.8%   | 3.2%  | 1.42        | 1.7%   | 2.1%       | --          | --     | 0.2%       | --          | --    | 5.4%   | 1.39        | 1.8%   |
| Heavy alcohol drinking           | 5.3%  | 0.74        | -1.3%  | 5.5%  | 2.33        | 6.7%   | 6.5%       | --          | --     | 2.9%       | --          | --    | 5.8%   | 0.47        | -2.4%  |
| Low physical activity            | 31.9% | 1.33        | 12.0%  | 19.1% | 1.01        | 0.2%   | 21.3%      | 2.19        | 19.8%  | 25.6%      | 1.29        | 7.5%  | 54.2%  | 1.35        | 17.0%  |
| Daily watching TV (2+ hours)     | 42.7% | 1.33        | 12.5%  | 48.4% | 1.51        | 19.8%  | 46.2%      | 1.19        | 7.2%   | 14.3%      | --          | --    | 50.9%  | 1.45        | 18.2%  |
| Low fruits and vegetables intake | 95.9% | 0.65        | -51.5% | 93.3% | 0.55        | -71.7% | 93.4%      | 0.68        | -42.6% | 98.1%      | --          | --    | 98.7%  | 0.51        | -95.0% |
| Obesity                          | 26.9% | <b>2.26</b> | 23.9%  | 31.7% | <b>7.50</b> | 61.2%  | 26.6%      | 1.59        | 10.1%  | 10.1%      | 1.32        | 2.4%  | 31.6%  | <b>1.78</b> | 19.0%  |

P = prevalence, PR = prevalence ratio, PAR = population attributable risk\

Bolded estimates are significant (p<0.05)

**E-Figure 1: Study participants flowchart, all sites**

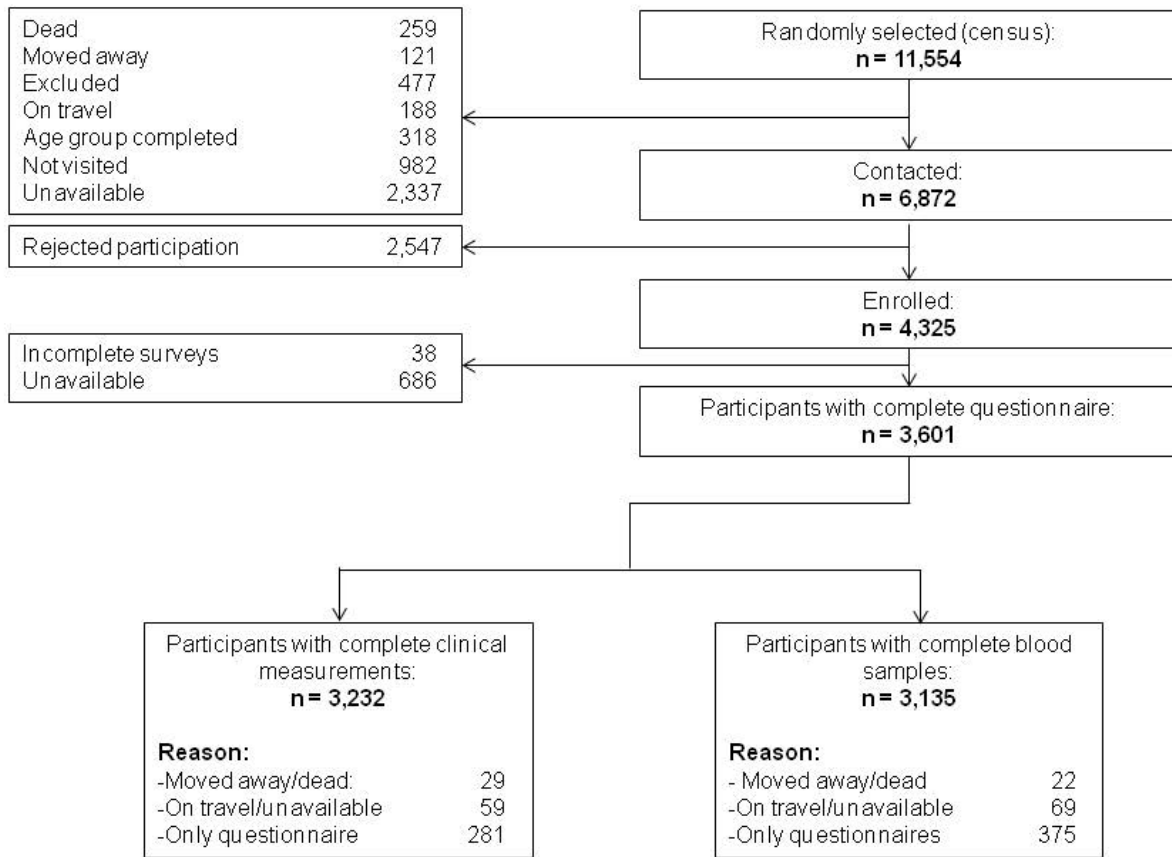

Supplement: jech-2015-205988-s1.pdf [file jech-2015-205988-s1.pdf]
